# Supplementary material for: A dual gene-specific mutator system installs all transition mutations at similar rates in vivo
Source: bioRxiv or medRxiv preprint supplement (doi:10.1101/2022.06.09.495438), 2022-06-12
Supplement: Supplementary file [file media-1.pdf]

# Appendix

## A dual gene-specific mutator system installs all transition mutations at similar rates *in vivo*

Daeje Seo, Ga-eul Eom, Hye Won Kim, and Seokhee Kim\*

Seoul National University

| <b>Contents</b>          | <b>Page</b> |
|--------------------------|-------------|
| <b>Table of Contents</b> | S1          |
| <b>Appendix Figure</b>   | S2-S3       |
| <b>Appendix Tables</b>   | S4-11       |
| <b>References</b>        | S12         |

\*Corresponding author: Seokhee Kim, seokheekim@snu.ac.kr

**A**

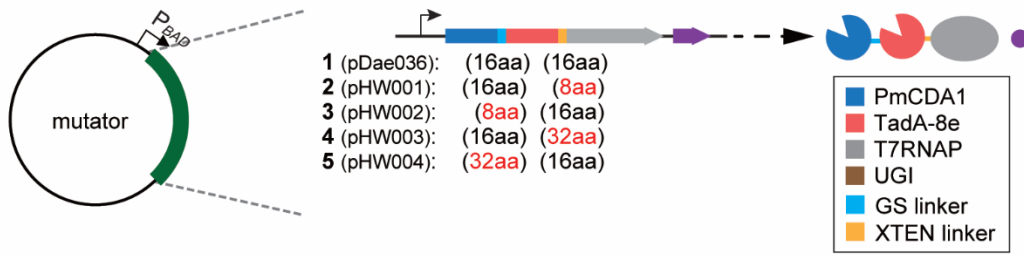

**B**

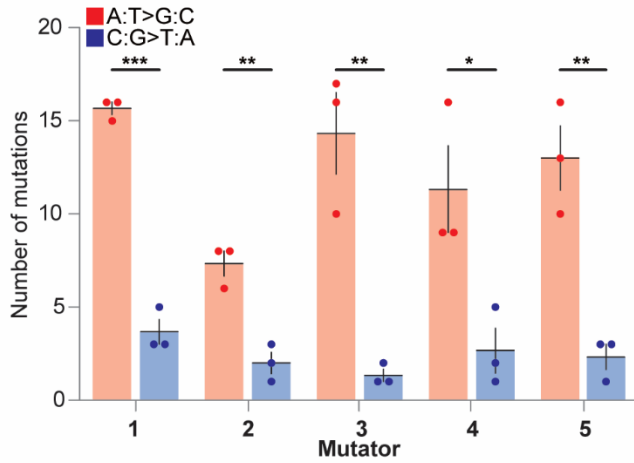

**C**

| Mutator-clone# | A:T>G:C                                                                                                    | mut# | C:G>T:A                          | mut# | total# |
|----------------|------------------------------------------------------------------------------------------------------------|------|----------------------------------|------|--------|
| 1-1            | -131*, -111*, -109*, -93*, -92*, -64*, -17*, D25D, Y31H, H148R, T162T, T170A, E210G, T251A, S314S          | 15   | -33*, Q41X, T216T                | 3    | 18     |
| 1-2            | -98*, -92*, -65*, -64*, -30*, -17*, -1*, E6E, S10G, V21V, D25G(GAT to GGC), Y31R(TAT to CGT), Y198C, K265K | 16   | -71*, F140F, F158F               | 3    | 19     |
| 1-3            | -92*, -59*, -17*, S2P, N26D, T39A, M42T, A56A, T112A, D114G, I145V, F160L, V173V, R186C, N233S, K324K      | 16   | A5V, I60I, P150S, R186C, P277L   | 5    | 21     |
| 2-1            | -92*, -63*, -17*, D25D, V109V, V173V, E236G, +56*                                                          | 8    | -70*, -36*, V29V                 | 3    | 11     |
| 2-2            | -108*, -92*, -59*, G121G, I145T, F220F, +20*, +117*                                                        | 8    | A9A, T251T                       | 2    | 10     |
| 2-3            | -59*, -17*, N61D, L83P, Y137C, +23*                                                                        | 6    | T251T                            | 1    | 7      |
| 3-1            | -133*, -93*, -92*, -85*, -66*, -59*, -44*, -17*, N26D, H37R, I145V, T157A, V173A, Q182R, N233S, Y290H      | 16   | L4L, T126T                       | 2    | 18     |
| 3-2            | -98*, -92*, -17*, H3H, I15I, N26D, N72N, F125F, T216A, V269A                                               | 10   | -71*                             | 1    | 11     |
| 3-3            | -92*, -89*, -82*, -81*, -66*, -64*, -59*, -17*, V8V, S16G, G33G, R74R, N84N, I113V, R167R, V173A, I218V    | 17   | G271S                            | 1    | 18     |
| 4-1            | -131*, -54*, -17*, D20D, R11R, E117E, F125F, T126A, Y137H                                                  | 9    | P49L                             | 1    | 10     |
| 4-2            | -109*, -92*, -77*, -65*, -17*, -6*, -2*, -1*, M1A(ATG to GCG), V21V, D25D, H37R, T91A, Y137C, T168A        | 16   | -110*, N61N, R176C, Q181X, P277L | 5    | 21     |
| 4-3            | -131*, -17*, K34E, Y198C, Y247C, T251A, K262E, S314S, +23*                                                 | 9    | -71*, L231L                      | 2    | 11     |
| 5-1            | -98*, -95*, -83*, -82*, -66*, -59*, -17*, L24L, N26N, Y31C, A82A, H138R, I145A(ATT to GCT), T168A, H228R   | 16   | Q69X                             | 1    | 17     |
| 5-2            | -131*, -98*, -96*, -77*, -51*, -17*, G33G, L38L, T112A, T126A, T163A, T177A, I285V                         | 13   | -68*, Q41X, A58A                 | 3    | 16     |
| 5-3            | -131*, -98*, -93*, -65*, -60*, -17*, -2*, I145V, H148R, V279A                                              | 10   | -48*, M42I, Q182X                | 3    | 13     |

Amino acids were numbered according to the protein sequence of *pheS*\_A294G

A>G mutation on the coding strand, red; T>C mutation on the coding strand, orange; C>T mutation on the coding strand, blue; G>A mutation on the coding strand, cyan

\* mutations not made on *pheS*\_A294G gene orf but made between a T7 promoter and a T7 terminator

**Appendix Figure S1. Linker optimization of a triple fusion protein, PmCDA1\_TadA-8e\_T7RNAP.**

A Design of variants with different linkers: two original linkers (1), a shorter linker between TadA-8e and T7RNAP (2), a shorter linker between PmCDA1 and TadA-8e (3), a longer linker between TadA-8e and T7RNAP (4), a longer linker between PmCDA1 and TadA-8e (5).

B Number of mutations found in six clones from samples shown in (A) at 20 mutagenesis cycle.

C A list of mutations found in samples shown in (B).

Data are presented as dot plots with mean  $\pm$  standard deviation (SD) (n = 6). \* $P < 0.05$ , \*\* $P < 0.01$ , \*\*\* $P < 0.001$ ; by Student's *t*-test.

**Appendix Table S1. *E. coli* strains used in this study**

| Strain  | Description                                 | Reference          |
|---------|---------------------------------------------|--------------------|
| W3110   |                                             |                    |
| cHYO057 | W3110 $\Delta ung::kan^R$                   | (Park & Kim, 2021) |
| cDJ085  | W3110 $\Delta alkA::Sm^R \Delta nfi::Kan^R$ | This study         |

**Appendix Table S2. Plasmids used in this study**

| Plasmid  | Construct                                          | Description                                                                              | reference                      |
|----------|----------------------------------------------------|------------------------------------------------------------------------------------------|--------------------------------|
| pBAD33   |                                                    | Experimental control/cloning vector                                                      |                                |
| pHyo094  | pBAD33-PmCDA1-T7RNAP, <i>ugi</i>                   | eMutaT7 <sup>PmCDA1</sup> , source of PmCDA1                                             | (Park & Kim, 2021)             |
| pHyo182  | pVS133-lacI, pheS_A294G                            | Target plasmid (pheS_A294G)                                                              | (Park & Kim, 2021)             |
| pHyo183  | pBAD33-T7RNAP, <i>ugi</i>                          | control                                                                                  | (Park & Kim, 2021)             |
| pHyo245  | pVS133-dualT7_pheS_A294G                           | Dual promoter system/cloning vector                                                      | (Park & Kim, 2021)             |
| pREMCM3  |                                                    | Tetracycline resistance gene                                                             | (Melancon & Schultz, 2009)     |
| TadA_mut | BamH1-GS-TadA*-GS-EcoR1                            | Source of TadA-7.10 gene                                                                 | (Gaudelli <i>et al</i> , 2017) |
| pDae027  | pCDF-TadA-8e-TadA-8e                               | Source of TadA-8e gene                                                                   | (Richter <i>et al</i> , 2020)  |
| pDae014  | pBAD33-PmCDA1-T7RNAP                               | eMutaT7 <sup>PmCDA1</sup> without <i>ugi</i>                                             | This study                     |
| pDae028  | pBAD33-TadA-7.10-T7RNAP                            | eMutaT7 <sup>TadA-7.10</sup>                                                             | This study                     |
| pDae029  | pBAD33-TadA-8e-T7RNAP                              | eMutaT7 <sup>TadA-8e</sup>                                                               | This study                     |
| pDae032  | pBAD33-TadA-8e                                     | Control                                                                                  | This study                     |
| pDae035  | pBAD33-TadA-8e-T7RNAP, PmCDA1-T7RNAP, <i>ugi</i>   | the expression of two mutators, eMutaT7 <sup>TadA-8e</sup> and eMutaT7 <sup>PmCDA1</sup> | This study                     |
| pDae036  | pBAD33-PmCDA1-TadA-8e-T7RNAP, <i>ugi</i>           | triply-fused protein of PmCDA1, TadA-8e, and T7RNAP                                      | This study                     |
| pDae037  | pBAD33-TadA-8e-PmCDA1-T7RNAP, <i>ugi</i>           | triply-fused protein of TadA-8e, PmCDA1 and T7RNAP                                       | This study                     |
| pDae043  | pBAD33-PmCDA1-T7RNAP, J23100(promoter), <i>ugi</i> | Constitutive promoter for <i>ugi</i>                                                     | This study                     |
| pDae044  | pBAD33- <i>ugi</i> -PmCDA1-T7RNAP                  | triply-fused protein of <i>ugi</i> , PmCDA1, and T7RNAP                                  | This study                     |

|         |                                                         |                                                                                                                   |            |
|---------|---------------------------------------------------------|-------------------------------------------------------------------------------------------------------------------|------------|
| pDae069 | pBAD33-PmCDA1-T7RNAP, (RBS) <i>ugi</i>                  | eMutaT7 <sup>PmCDA1</sup> with optimized RBS                                                                      | This study |
| pDae079 | pBAD33-TadA-8e-T7RNAP, PmCDA1-T7RNAP, (RBS) <i>ugi</i>  | eMutaT7 <sup>transition</sup>                                                                                     | This study |
| pDae080 | pBAD33-PmCDA1-T7RNAP, (RBS) <i>ugi</i> , TadA-8e-T7RNAP | the expression of two mutators, eMutaT7 <sup>PmCDA1</sup> and eMutaT7 <sup>TadA-8e</sup> and optimized <i>ugi</i> | This study |
| pHW001  | pBAD33-PmCDA1-16aa-TadA-8e-8aa-T7RNAP, <i>ugi</i>       | Shoter XTEN linker                                                                                                | This study |
| pHW002  | pBAD33-PmCDA1-8aa-TadA-8e-16aa-T7RNAP, <i>ugi</i>       | Shoter GS linker                                                                                                  | This study |
| pHW003  | pBAD33-PmCDA1-16aa-TadA-8e-32aa-T7RNAP, <i>ugi</i>      | Longer XTEN linker                                                                                                | This study |
| pHW004  | pBAD33-PmCDA1-32aa-TadA-8e-16aa-T7RNAP, <i>ugi</i>      | Longer XTEN linker                                                                                                | This study |
| pGE158  | pVS133-dualT7_ss-TEM-1, tetR                            | Evolution target (TEM-1)                                                                                          | This study |

**Appendix Table S3. Primers used in this study**

| Oligonucleotides      | Sequence (5'→3')                                                        | Description                                                                                 |
|-----------------------|-------------------------------------------------------------------------|---------------------------------------------------------------------------------------------|
| T7promoter            | TAATACGACTCACTATAGGG                                                    | Universal sequencing primer                                                                 |
| T7terminator          | GCTAGTTATTGCTCAGCGG                                                     | Universal sequencing primer                                                                 |
| pBAD-F                | ATGCCATAGCATT TTTATCC<br>A                                              | Universal sequencing primer                                                                 |
| pBAD-R                | GATTTAATCTGTATCAGG                                                      | Universal sequencing primer                                                                 |
| 022_PxUgT_PxT_ovlp_fw | aacacgattaacatcgcctaagaacg                                              | Cloning of TadA-8e-T7RNAP(pDae029)                                                          |
| 029_pBAD_Gibson_rv    | CCATGGtgaattcctcctGagctcg                                               | Cloning of TadA-7.10-T7RNAP(pDae028)                                                        |
| 052_T7RNAPQ265_rv     | gttgacgctcaaacatcttgc                                                   |                                                                                             |
| 053_PmCDA_P57_rv      | gggctgttgacggcatag                                                      |                                                                                             |
| 054_PmCDA_G137_fw     | ggactctggaatctgaggg                                                     |                                                                                             |
| 055_UPT-GS_ovlp_fw    | GTAGCGGCTCTGGTTCCGG<br>CTCTGGTAGCGGATCCAcag<br>acgccgagtagctg           | Cloning of pBAD33-TadA-8e-PmCDA1-T7RNAP, ugi (pDae037)                                      |
| 058_PUT2_GS_ovlp_rv   | CCGGAACCAGAGCCGCTAC<br>CAGAGCCGGAACCaacggctg<br>gagacttagtg             | Cloning of pBAD33-PmCDA1-TadA-8e-T7RNAP, ugi (pDae036)                                      |
| 062_pYH103_ovlp1_rv   | ATGCCATGGtgaattcctc                                                     | Cloning of pBAD33-TadA-8e-PmCDA1-T7RNAP, ugi (pDae037)                                      |
| 063_PmCDA_ovlp1_fw    | ctCaggaggaattcaCCATGGC                                                  | Cloning of pBAD33-TadA-8e-PmCDA1-T7RNAP, ugi (pDae037)                                      |
| 128_pYH103_dpoll_rv   | catATGCCATGGtgaattcctc                                                  | Cloning of TadA-8e-T7RNAP(pDae029)                                                          |
| 129_nfi_fw            | GGTCACGGCATTTCATCAGG                                                    |                                                                                             |
| 130_nfi_rv            | GACATGCTGCCAGCTTTCC                                                     |                                                                                             |
| 131_alkA_fw           | GCGAAATGTTGCCGTCGC                                                      |                                                                                             |
| 132_alkA_rv           | CCCATCGCCTGATGCGAC                                                      |                                                                                             |
| 133_TadA8e_IVA_fw     | ctCaggaggaattcaCCATGGCAT<br>ATGAGTGAAGTTGAATTCAG<br>CCATG               | Cloning of TadA-8e-T7RNAP(pDae029)                                                          |
| 134_TadA8e_IVA_rv     | gaagtcgttcttagcgatgtaacgtgta<br>ctttcgggtgtggcg                         | Cloning of TadA-8e-T7RNAP(pDae029)                                                          |
| 137_TadAdimer_del_fw  | GGTTCCGGTAGCTTGTCTG<br>AAGTC                                            | Cloning of TadA-7.10-T7RNAP(pDae028)                                                        |
| 138_TadA_del_fw       | CATATGTCTGAAGTCGAATT<br>TAGCCACG                                        | Cloning of TadA-7.10-T7RNAP(pDae028)                                                        |
| 161_dalkA_SmR3_fw     | ATGGCGGCAAATTGACCG<br>CCAGAGTGGCACAGCTTTA<br>TGgcgaccgagtgagctagctatttg | Amplification of streptomycin resistance gene from pCDF for construction of alkA k/o strain |
| 162_dalkA_SmR3_rv     | GGGAAGCAGATATACTCCG<br>GAAAATCATCCAGCCGTTC<br>GCgaacgaattgtagacattattg  | Amplification of streptomycin resistance gene from pCDF for construction of alkA k/o strain |

|                         |                                                                                   |                                                                                           |
|-------------------------|-----------------------------------------------------------------------------------|-------------------------------------------------------------------------------------------|
| 163_Am7(8e)_dL_rv       | ggagtctcgctgccgcttaATTAATG<br>CTG                                                 | Cloning of TadA-8e(pDae032)                                                               |
| 165_Am7(8e)_dT7_fw      | ggacttcgcggttcgcgtaa                                                              | Cloning of TadA-8e(pDae032)                                                               |
| 170_duet_Am7_IVA2_fw    | cagaatttgctggcggcagactttcata<br>ctcccgccattcagagaag                               | Cloning of pDae035, pDae079 (=eMutaT7 <sup>transition</sup> ), and pDae080                |
| 171_duet_tm_Am7_IVA1_rv | cagggttattgtctcatgagcg                                                            | Cloning of pDae035, pDae079 (=eMutaT7 <sup>transition</sup> ), and pDae080                |
| 172_duet_PxT_IVA2_rv    | ctgccgccaggcaaattc                                                                | Cloning of pDae035, pDae079 (=eMutaT7 <sup>transition</sup> ), and pDae080                |
| 173_duet_tm_PxT_IVA1_fw | gtatccgctcatgagacaataacc                                                          | Cloning of pDae035, pDae079 (=eMutaT7 <sup>transition</sup> ), and pDae080                |
| 174_PgAxT_PxT_IVA1_fw   | ctcccgggacctcagagtc                                                               | Cloning of pBAD33-PmCDA1-TadA-8e-T7RNAP, ugi (pDae036)                                    |
| 175_PgAxT_TadA8_IVA1_fw | GTAGCGGCTCTGGTTCCGG<br>CTCTGGTAGCGGATCCAGT<br>GAAGTTGAATTCAGCCATG                 | Cloning of pBAD33-PmCDA1-TadA-8e-T7RNAP, ugi (pDae036)                                    |
| 176_PgAxT_TadA8_IVA1_rv | ggactctgaggctccggg                                                                | Cloning of pBAD33-PmCDA1-TadA-8e-T7RNAP, ugi (pDae036)                                    |
| 177_AgPxT_TadA8_IVA2_rv | CCGGAACCAGAGCCGCTAC<br>CAGAGCCGGAACCATTAAT<br>GCTGCTCTGTGCTTTCT                   | Cloning of pBAD33-TadA-8e-PmCDA1-T7RNAP, ugi (pDae037)                                    |
| 182_dnfi_KanR_fw        | ATGGATCTCGCGTCATTACG<br>CGCTCAACAAATCGAACTG<br>GCTTGATCCTTTGATCTTTT<br>CTACGGGGtc | Amplification of kanamycin resistance gene from pET28b for construction of nfi k/o strain |
| 183_dnfi_KanR_rv        | TTAGGGCTGATTTGCTGTAT<br>AGCGCACGAACGCCGGACG<br>TTCCGATGGCACTTTTCCGG<br>GGAAATGTG  | Amplification of kanamycin resistance gene from pET28b for construction of nfi k/o strain |
| 184_ugi-F               | caaaccctgggctctggtg                                                               |                                                                                           |
| 185_Amp-R               | cagcatctttactttcaccagc                                                            |                                                                                           |
| 186_T7RNAP_PstI_rv      | atactgcagttacggaacggaagtcc                                                        | Cloning of pBAD33-PmCDA1-T7RNAP (pDae014)                                                 |
| 192_ugi_IVA-F           | ctCaggaggaattcaCCATGGCAT<br>atgaccaacctttccgacatc                                 | Cloning of pBAD33-ugi-PmCDA1-T7RNAP (pDae044)                                             |
| 193_ugi_IVA-R           | CCGGAACCAGAGCCGCTAC<br>CAGAGCCGGAACCtagcatctg<br>atctgttctctcc                    | Cloning of pBAD33-ugi-PmCDA1-T7RNAP (pDae044)                                             |



|                      |                                                                            |                                                                            |
|----------------------|----------------------------------------------------------------------------|----------------------------------------------------------------------------|
| 194_ugi-J23100-R     | ctaggactgagctagccgtcaaaggatc<br>ccccgggctgcaG                              | Cloning of pBAD33-<br>PmCDA1-T7RNAP,<br>J23100(promoter), ugi<br>(pDae043) |
| 195_ugi-J23100-RBS-F | gtacagtgctagcctagagtcaggagg<br>agacctgcatgaccaaccttcc                      | Cloning of pBAD33-<br>PmCDA1-T7RNAP,<br>J23100(promoter), ugi<br>(pDae043) |
| 223-pHyo250-IVA-F    | AGCACCACCACCACCACCA<br>CTG                                                 | Cloning of pVS133-<br>dualT7_ss-TEM-1, tetR<br>(pGE158)                    |
| 224-pHyo250-IVA-R    | CATGGTATATCTCCTTCTTA<br>AAGTTAAACAAAA                                      | Cloning of pVS133-<br>dualT7_ss-TEM-1, tetR<br>(pGE158)                    |
| 225-TEM1-IVA-F       | CCTCTAGAAATAATTTGTTT<br>AACTTTAAGAAGGAGATATA<br>CCatgagtattcaacattccgtgtcg | Cloning of pVS133-<br>dualT7_ss-TEM-1, tetR<br>(pGE158)                    |
| 226-TEM1-IVA-R       | CAGTGGTGGTGGTGGTGGT<br>GCTctcgaGttaccaatgcttaatcagt<br>gagg                | Cloning of pVS133-<br>dualT7_ss-TEM-1, tetR<br>(pGE158)                    |
| 231-AxT-32aa-F       | CTCTGGTTCGGCTCTGGT<br>AGCGGATCCAgcggcagcgaga<br>ctccc                      | Cloning of pBAD33-<br>PmCDA1-16aa-TadA-8e-<br>32aa-T7RNAP, ugi<br>(pHW003) |
| 232-AxT-32aa-R       | CCGCTACCAGAGCCGGAAC<br>CATTAAATGCTGCTCTGTGCT<br>TTCTTTTGTG                 | Cloning of pBAD33-<br>PmCDA1-16aa-TadA-8e-<br>32aa-T7RNAP, ugi<br>(pHW003) |
| 235-GS-32aa-F        | ctcagagtccgccacaccccgaagtA<br>GTGAAGTTGAATTCAGCCAT<br>G                    | Cloning of pBAD33-<br>PmCDA1-32aa-TadA-8e-<br>16aa-T7RNAP, ugi<br>(pHW004) |
| 236-GS-32aa-R        | gtcccgggagtctcgctgccAcTGGA<br>TCCGCTACCA                                   | Cloning of pBAD33-<br>PmCDA1-32aa-TadA-8e-<br>16aa-T7RNAP, ugi<br>(pHW004) |
| 239_PstI_pBAD_fw     | ataaCTGCAGgcatgcaagc                                                       | Cloning of pBAD33-TadA-<br>7.10-T7RNAP                                     |
| 240-Ftet-IVA-F       | ctgtcagaccaagttactcaactg                                                   | Cloning of pVS133-<br>dualT7_ss-TEM-1, tetR<br>(pGE158)                    |
| 241-Ftet-IVA-R       | gacataagtccatcagttcaacgg                                                   | Cloning of pVS133-<br>dualT7_ss-TEM-1, tetR<br>(pGE158)                    |
| 242-TcR-IVA-F        | gacttccgtgaactgatggacttatgtcg<br>taattctcatgtttgacagcttatcatc              | Cloning of pVS133-<br>dualT7_ss-TEM-1, tetR<br>(pGE158)                    |
| 243-TcR-IVA-R        | cgcagttgagtaaacttggctctgacagtg<br>gagtggtgaatccggttagc                     | Cloning of pVS133-<br>dualT7_ss-TEM-1, tetR<br>(pGE158)                    |

|                        |                                                                      |                                                                           |
|------------------------|----------------------------------------------------------------------|---------------------------------------------------------------------------|
| 245-G8aa-F             | ccgaaagtAGTGAAGTTGAATT<br>CAGCCATGAATATTG                            | Cloning of pBAD33-<br>PmCDA1-8aa-TadA-8e-<br>16aa-T7RNAP, ugi<br>(pHW002) |
| 246-G8aa-R             | gtgtggcggactctgaaacggctggag<br>acttagtgg                             | Cloning of pBAD33-<br>PmCDA1-8aa-TadA-8e-<br>16aa-T7RNAP, ugi<br>(pHW002) |
| 247-X8aa-F             | CTCTGGTAGCGGCTCTaaca<br>cgattaacatcgctaagaacg                        | Cloning of pBAD33-<br>PmCDA1-16aa-TadA-8e-<br>8aa-T7RNAP, ugi (pHW001)    |
| 248-X8aa-R             | CCGGAACCATTAATGCTGCT<br>CTGTGCTTTCTTTTGTG                            | Cloning of pBAD33-<br>PmCDA1-16aa-TadA-8e-<br>8aa-T7RNAP, ugi (pHW001)    |
| 254_pBAD-NdeI_rv       | aatCATATGCCATGGtgaattcct<br>c                                        | Cloning of pBAD33-TadA-<br>7.10-T7RNAP                                    |
| 255-TadA-A113-R        | GCACCGCGCTTGCTATTAC                                                  |                                                                           |
| 314-F-seq-F2           | CATTAGGAAGCAGCCCAGT<br>AGTAG                                         | sequencing primer for target<br>gene                                      |
| 315-F-seq-R2           | gagacgaaagggcccgtacg                                                 | sequencing primer for target<br>gene                                      |
| 316-UGI-RBS-F          | CAATAAATAAGGAGGATTTT<br>Ttatgaccaaccttccgacatcataga<br>g             | Cloning of pBAD33-<br>PmCDA1-T7RNAP, (RBS)<br>ugi (pDae069)               |
| 318-UGI-RBS-R          | CTAGTACTCAAACAGAGCG<br>CGCTCTGTTaggatccccgggctg<br>caG               | Cloning of pBAD33-<br>PmCDA1-T7RNAP, (RBS)<br>ugi (pDae069)               |
| 341_NdeI_tadA_fw       | TTAcatatgTTGTCTGAAGTCG<br>AATTTAGCCAC                                | Cloning of pBAD33-TadA-<br>7.10-T7RNAP                                    |
| 367_T7RNAP_taa_PstI_rv | ttatctgcagttacggaacggaagtcc                                          | Cloning of pBAD33-TadA-<br>7.10-T7RNAP                                    |
| 368_28b_th_rv          | CATATGGCTGCCGCG                                                      | Cloning of pET28b-TadA-<br>7.10-T7RNAP                                    |
| 369_28b_ov_tadA_fw     | GGTGCCGCGCGGCAGCCAT<br>ATGTTGTCTGAAGTCGAATT<br>TAGCCACG              | Cloning of pET28b-TadA-<br>7.10-T7RNAP                                    |
| 370_tadA_XTEN_ov_rv    | gtggcggactctgaggtcccgggagtct<br>cgctgccgctATCCGTCGAGGAT<br>TGCG      | Cloning of pET28b-TadA-<br>7.10-T7RNAP                                    |
| 371_ov_XTEN_T7RNAP_fw  | gactcccgggacctcagagtccgccac<br>accgaaagtaacacgattaacatcgct<br>aagaac | Cloning of pET28b-TadA-<br>7.10-T7RNAP                                    |

|                        |                    |                                                  |
|------------------------|--------------------|--------------------------------------------------|
| 473_pBAD_dugi_fw__w187 | aagcttggctgttttggc | Cloning of pBAD33-<br>PmCDA1-T7RNAP<br>(pDae014) |
|------------------------|--------------------|--------------------------------------------------|

## REFERENCES

Gaudelli NM, Komor AC, Rees HA, Packer MS, Badran AH, Bryson DI, Liu DR (2017) Programmable base editing of A\*T to G\*C in genomic DNA without DNA cleavage. *Nature* 551: 464-471

Melancon CE, 3rd, Schultz PG (2009) One plasmid selection system for the rapid evolution of aminoacyl-tRNA synthetases. *Bioorg Med Chem Lett* 19: 3845-3847

Park H, Kim S (2021) Gene-specific mutagenesis enables rapid continuous evolution of enzymes in vivo. *Nucleic Acids Res* 49: e32

Richter MF, Zhao KT, Eton E, Lapinaite A, Newby GA, Thuronyi BW, Wilson C, Koblan LW, Zeng J, Bauer DE *et al* (2020) Phage-assisted evolution of an adenine base editor with improved Cas domain compatibility and activity. *Nat Biotechnol* 38: 883-891
